# Supplementary material for: A novel identified circular RNA, circ_0000491, aggravates the extracellular matrix of diabetic nephropathy glomerular mesangial cells through suppressing miR-101b by targeting TGFβRI
Source: PubMed Central journal article supplement — Mol Med Rep. 2020 Sep 2;22(5):3785–94. doi: 10.3892/mmr.2020.11486 (PMC7533486; doi:10.3892/mmr.2020.11486), 2020-09-02

Figure S1. Expression of mmu\_circ\_0000712, mmu\_circ\_0000898, novel\_circ\_0001857 and novel\_circ\_0001778 in kidney tissue of *db/db* mice. Reverse transcription-quantitative PCR estimated the expression levels of (A) mmu\_circ\_0000712, (B) mmu\_circ\_0000898, (C) novel\_circ\_0001857 and (D) novel\_circ\_0001778 in diabetic nephropathy mice. \*\* $P < 0.01$  *db/db* group vs. *Db/dm* group. circRNA, circular RNA.

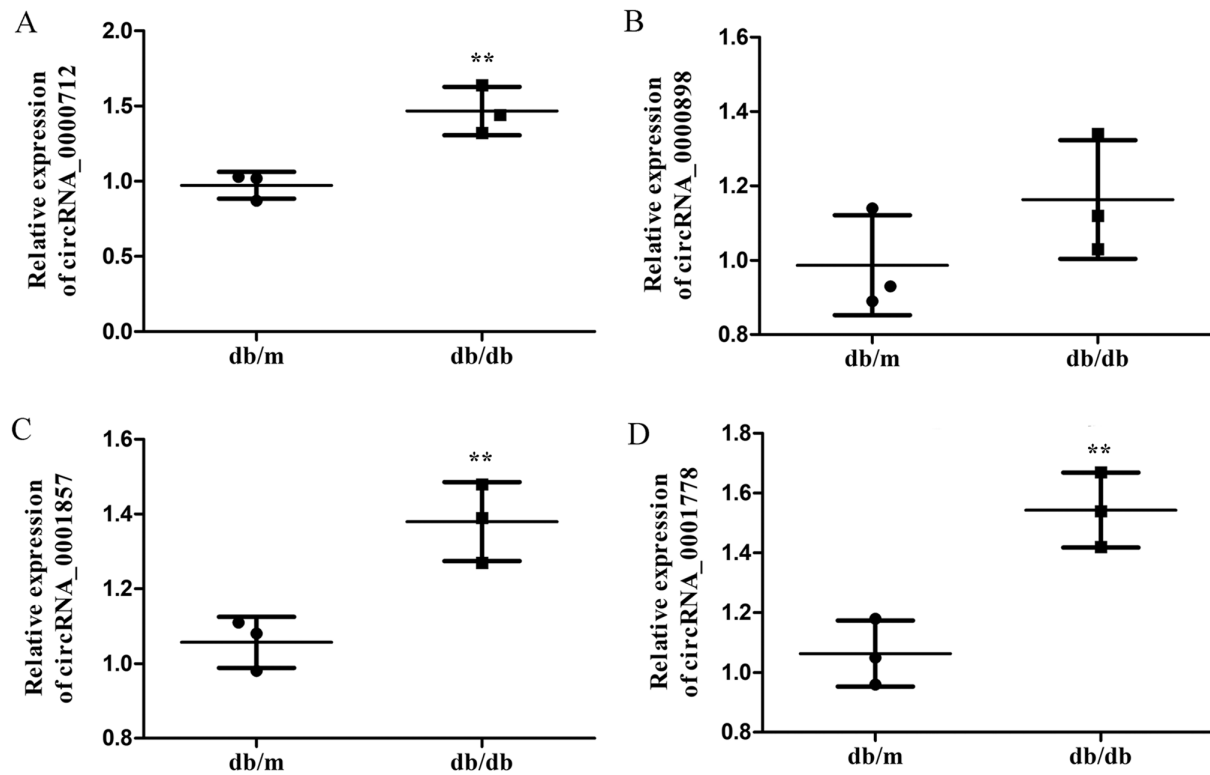

Supplement: Supplementary_Data.pdf [file Supplementary_Data.pdf]
